# Supplementary material for: A DREB-Like Transcription Factor From Maize (Zea mays), ZmDREB4.1, Plays a Negative Role in Plant Growth and Development
Source: PubMed Central journal article supplement (PMC5893645; doi:10.3389/fpls.2018.00395), 2018-04-04
Supplement: Image_1.pdf [file Image_1.pdf]

## Supplementary Materials

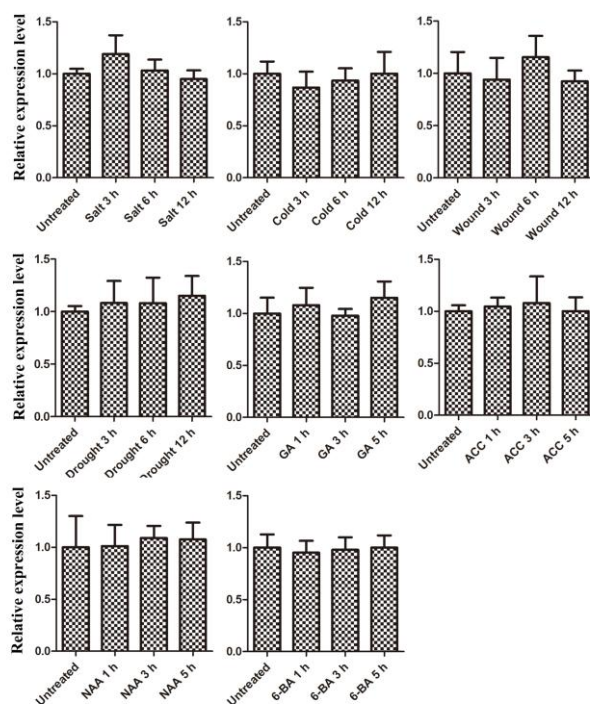

**Fig. S1** The expression pattern of the *ZmDREB4.1* gene under various abiotic stresses

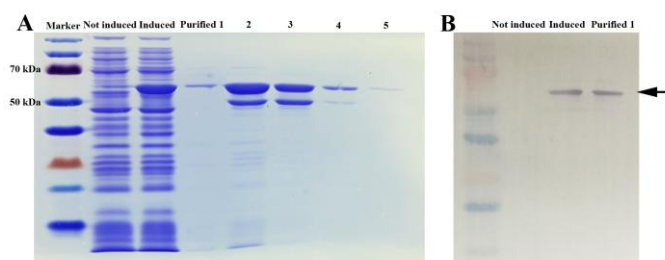

**Fig. S2** MBP-ZmDREB4.1<sub>31-147 aa</sub> fusion protein was obtained by the prokaryotic expression system. (A) SDS-PAGE analysis of the ZmDREB4.1<sub>31-147 aa</sub> fusion protein. (B) Western blot analysis of the ZmDREB4.1<sub>31-147 aa</sub> fusion protein. ZmDREB4.1<sub>31-147 aa</sub> fusion protein is about 57 kDa and the black arrows indicated the target strips. The purified 1 protein was used for EMSA.

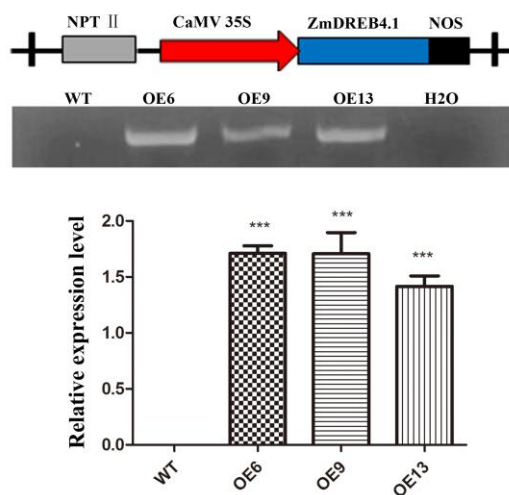

### Fig. S3 Generation of *ZmDREB4.1*-overexpressing tobacco

The recombinant plasmid (p35S::*ZmDREB4.1*) was transformed into tobacco using the leaf disc method. PCR analysis was performed using genomic DNA as the template and primer pair *ZmDREB4.1*-F/R. In addition, qRT-PCR was performed using cDNA synthesized from total mRNA as template and primer pair *ZmDREB4.1*-qRT-F/R. The wild type was used as the control.

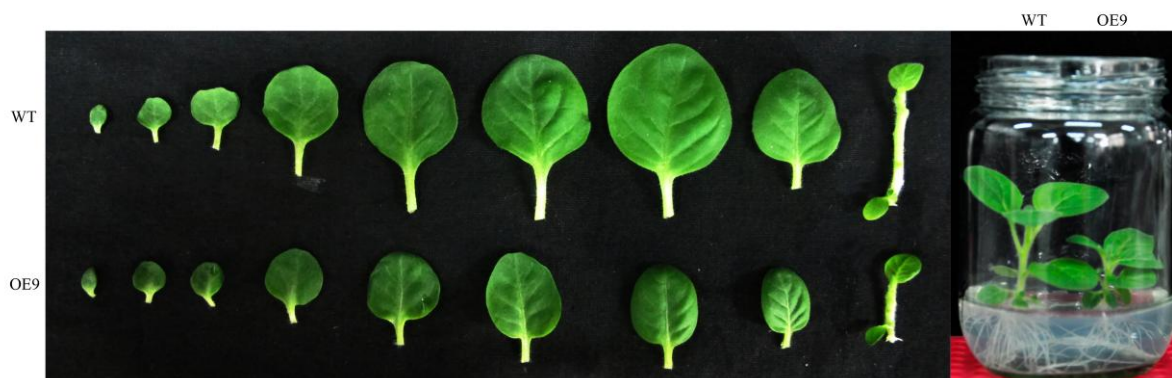

Fig. S4 Overexpression of *ZmDREB4.1* did not influence leaf number in transgenic tobacco.

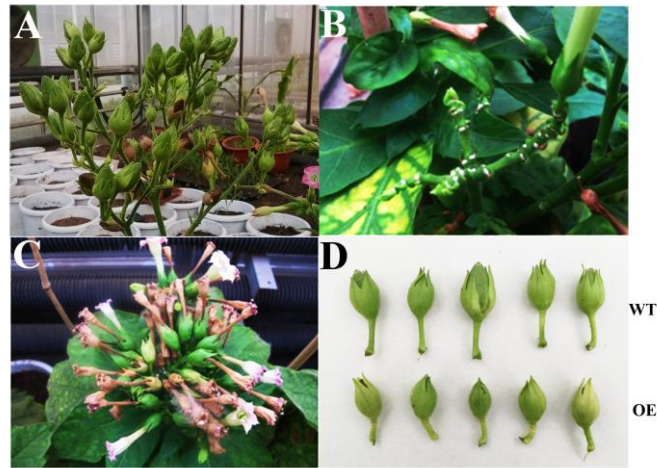

**Fig. S5 Phenotype observation of *ZmDREB4.1*-overexpressing tobacco at the reproductive stage**

(A) WT. *ZmDREB4.1*-overexpressing lines exhibited earlier abscission of flowers (B) or shorter pedicels (C) and (D).

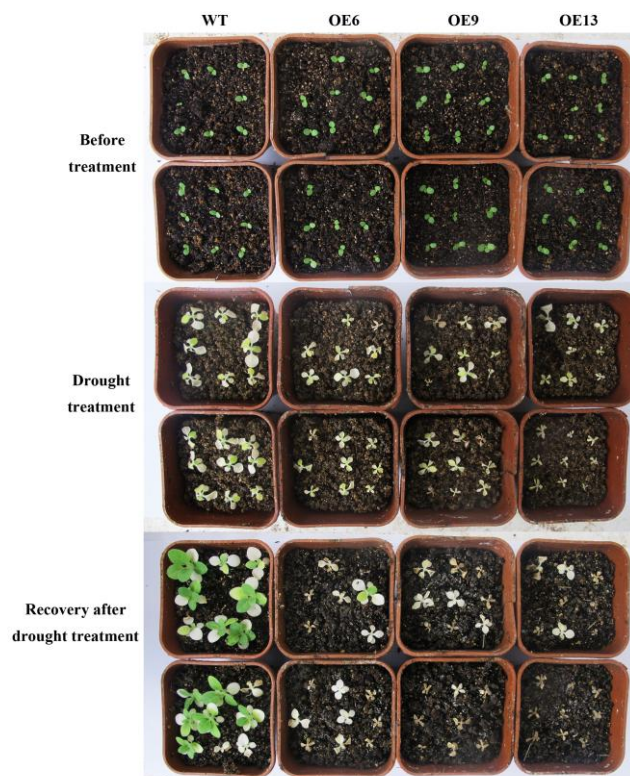

**Fig. S6 Overexpression of *ZmDREB4.1* decreased drought tolerance in transgenic tobacco.**
